# Supplementary material
Source: Springer Nature journal article supplement (https://www.springermedizin.de/resource/supplementary/13075_2012_4437_MOESM7_ESM.pdf/10110406)

# 1) Innate immunity

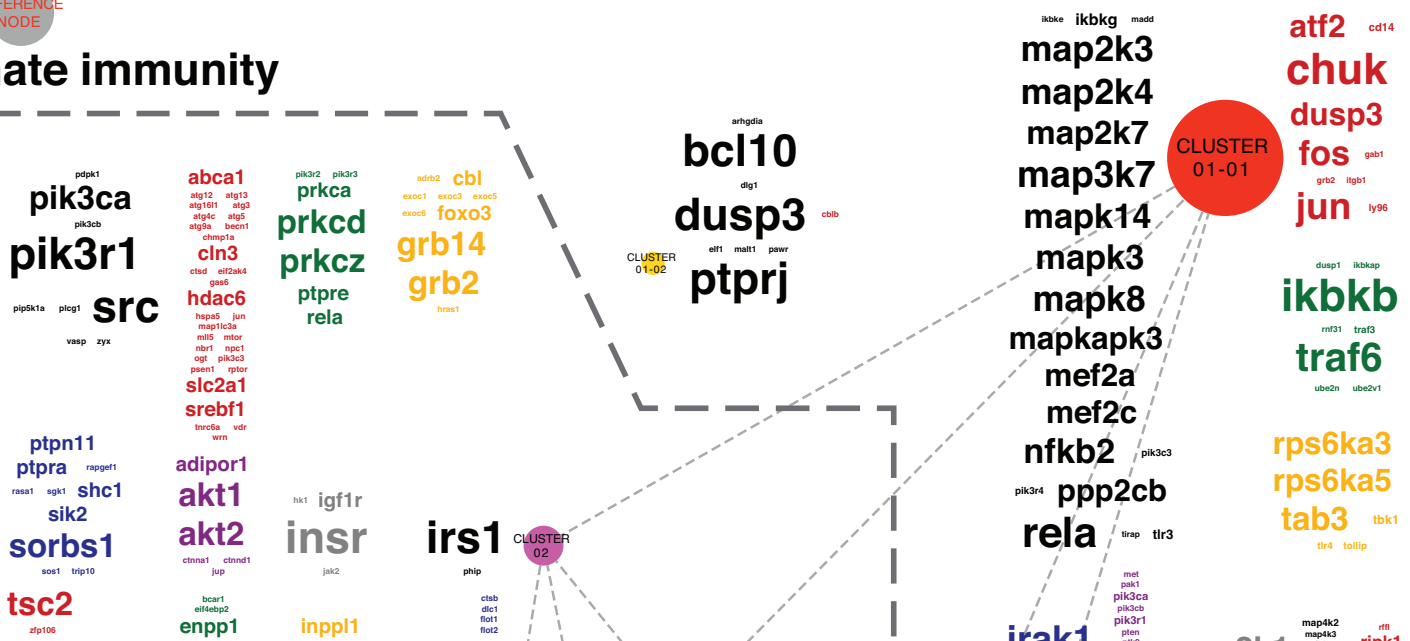

# 2) Insr / Igfr1 signaling

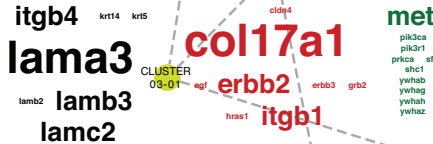

# 3) Focal adhesion & motility

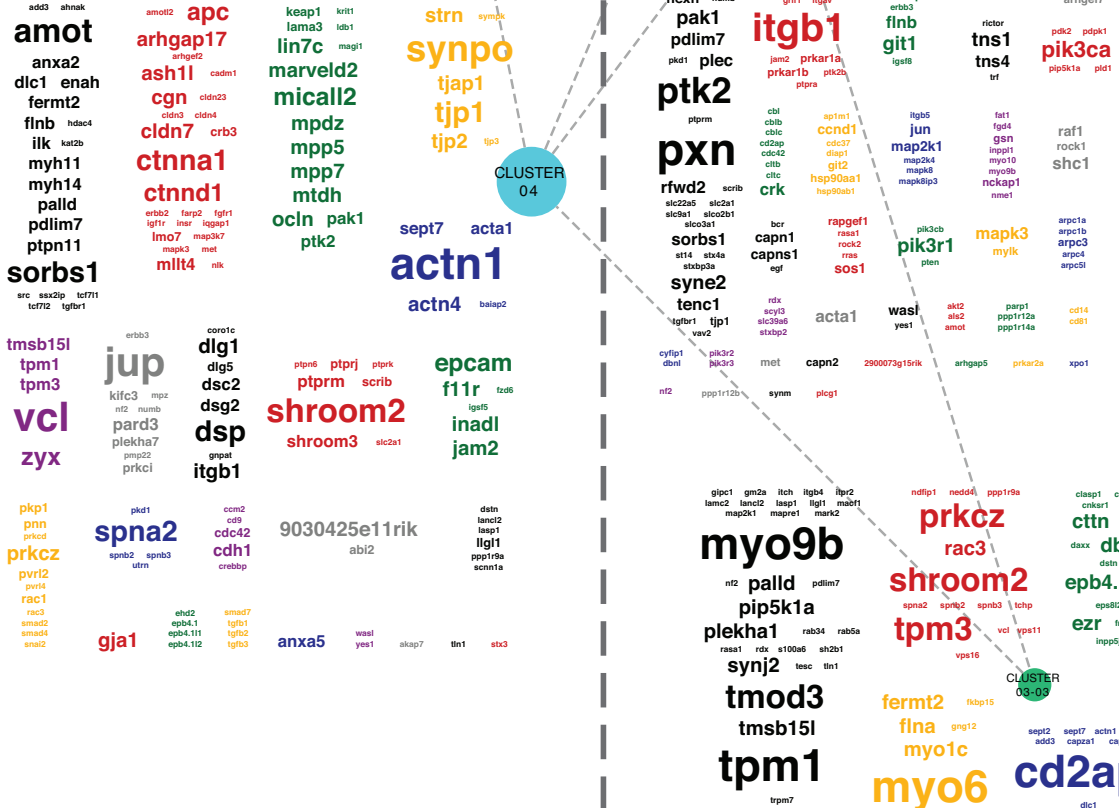

# 4) Cell-cell junctions & cytoskeleton organization

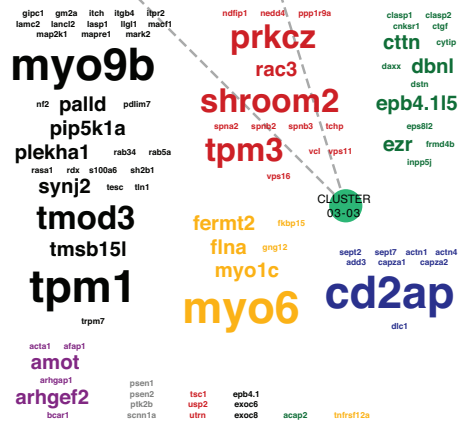

Supplement: MOESM7 [file 10110406]
